# Supplementary material for: Induction of the IL-1RII decoy receptor by NFAT/FOXP3 blocks IL-1β-dependent response of Th17 cells
Source: eLife. 2021 Jan 28;10:e61841. doi: 10.7554/eLife.61841 (PMC7872515; doi:10.7554/eLife.61841)
Supplement: Figure 1—source data 1. [file elife-61841-fig1-data1.xlsx]

## Sheet: B
B		% IL-17+IFN-γ- cells				% IL-17+IFN-γ+ cells				IL-17A (pg/ml)
		PBS	IL-1β			PBS	IL-1β			PBS	IL-1β
	HC2014039	4.16	7.03		HC2014039	1.94	2.54		HC2015087	65.45	327.82
	HC2014099	5.95	7		HC2014099	1.68	2.89		HC2015088	63.29	175.9
	HC2014041	4.23	7.2		HC2014041	0.98	2.05		HC2016090	133.99	698.02
	HC2014040	6.81	4.63		HC2014040	0.22	0.64		HC2016091	97.2	905.35
	HC2016186	4.21	7.27		HC2016186	1.51	1.94		HC2016186	343.64	471.19
	HC2016187	5.86	6.62		HC2016187	0.91	1.65		HC2016187	433.26	1215.46
	HC3254	2.98	4.59		HC3254	1.11	1.43
	HC2015087	2.33	5.16		HC2015087	0.76	1.56
	HC2015088	2.43	3.9		HC2015088	0.52	1.52
	HC2016090	2.39	5.3		HC2016090	0.88	2.97
	HC2016091	2.18	5.06		HC2016091	0.78	2.13
