# Supplementary material for: Induction of the IL-1RII decoy receptor by NFAT/FOXP3 blocks IL-1β-dependent response of Th17 cells
Source: eLife. 2021 Jan 28;10:e61841. doi: 10.7554/eLife.61841 (PMC7872515; doi:10.7554/eLife.61841)
Supplement: Figure 1—source data 2. [file elife-61841-fig1-data2.xlsx]

## Sheet: C
C		% IL-17-IFN-γ+ cells				% IL-10+ cells
		PBS	IL-1β			PBS	IL-1β
	HC2014039	31.4	27.4		HC2016186	1.02	0.44
	HC2014099	13.8	19.2		HC2016187	0.83	0.61
	HC2014041	16.7	27.2		HC3254	2.17	0.98
	HC2014040	5.17	10.6		HC2015087	1.56	0.62
	HC2016186	26.5	31.3		HC2015088	2.11	0.75
	HC2016187	8.3	23		HC2016090	2.21	0.88
	HC3254	22.4	18.3		HC2016091	1.15	1.08
	HC2015087	13.1	19.5
	HC2015088	14.3	20.5
	HC2016090	28.5	31.1
	HC2016091	28.2	29.8
