# Supplementary material for: Induction of the IL-1RII decoy receptor by NFAT/FOXP3 blocks IL-1β-dependent response of Th17 cells
Source: eLife. 2021 Jan 28;10:e61841. doi: 10.7554/eLife.61841 (PMC7872515; doi:10.7554/eLife.61841)
Supplement: Figure 1—source data 3. [file elife-61841-fig1-data3.xlsx]

## Sheet: D
D		IL-17A (pg/ml)
		PBS	IL-1β+IL-6+IL-23	IL-1β	IL-6	IL-23
	HC2016186	343.64	559.64	471.19	61.53	189
	HC2016187	433.26	1649.84	1215.46	179.86	194.15
	HC2016180	50.45	855.32	855.72	80.64	69.36
	HC2016182	5.51	145.93	91.33	9.69	12.59
	HC3299	7.43	293.59	293.21	5.83	7.75
	HC3254	29.21	680.98	499.38	18.75	26.26
