# Supplementary material for: Induction of the IL-1RII decoy receptor by NFAT/FOXP3 blocks IL-1β-dependent response of Th17 cells
Source: eLife. 2021 Jan 28;10:e61841. doi: 10.7554/eLife.61841 (PMC7872515; doi:10.7554/eLife.61841)
Supplement: Figure 1—source data 4. [file elife-61841-fig1-data4.xlsx]

## Sheet: E
E		IL-17A (pg/ml)
		PBS	IL-1β+IL-6+IL-23+TGF-β	IL-1β+TGF-β	IL-1β+IL-6+TGF-β	IL-1β+IL-23+TGF-β	IL-6+IL-23+TGF-β
	HC2104101	2.699	422.754	3.489	0	87.191	5.243
	HC2016180	0.835	114.791	0.797	10.005	17.858	2.21
	HC2016182	3.053	38.526	3.46	15.182	16.536	3.87
	HC3299	0	90.48	3.135	8.528	10.64	5.963
	HC3254	0.874	521.18	5.496	42.222	101.422	4.282
