# Supplementary material for: Induction of the IL-1RII decoy receptor by NFAT/FOXP3 blocks IL-1β-dependent response of Th17 cells
Source: eLife. 2021 Jan 28;10:e61841. doi: 10.7554/eLife.61841 (PMC7872515; doi:10.7554/eLife.61841)
Supplement: Figure 2—source data 1. [file elife-61841-fig2-data1.xlsx]

## Sheet: A
		% each subsets
A		IL-1RI+	IL-1RII+
	HC2014050	7.692	0.202
	HC2014052	5.854	0.254
	HC2014055	10.011	0.095
	HC2015056	10.3038	0.01482
	HC2014084	6.511	0.731
	HC2015036	10.26	0.258
	HC2015037	10.158	0.188
	HC2015041	6.173	0.078
	HC2015042	11.52	0.29
	HC2016175	15.6	0.5
	HC2016176	5.99	0.77
	HC2016177	4.61	0.54
	HC2016182	5.528	0.328
