# Supplementary material for: Induction of the IL-1RII decoy receptor by NFAT/FOXP3 blocks IL-1β-dependent response of Th17 cells
Source: eLife. 2021 Jan 28;10:e61841. doi: 10.7554/eLife.61841 (PMC7872515; doi:10.7554/eLife.61841)
Supplement: Figure 2—source data 2. [file elife-61841-fig2-data2.xlsx]

## Sheet: B
B		% IL-1RI+ cells
		naïve	memory
	HC2014050	2.96	9.9
	HC2014052	3.05	7.82
	HC2014055	4.11	12.5
	HC2014056	14.2	19.5
	HC2014084	4.04	11.5
