# Supplementary material for: Induction of the IL-1RII decoy receptor by NFAT/FOXP3 blocks IL-1β-dependent response of Th17 cells
Source: eLife. 2021 Jan 28;10:e61841. doi: 10.7554/eLife.61841 (PMC7872515; doi:10.7554/eLife.61841)
Supplement: Figure 2—source data 3. [file elife-61841-fig2-data3.xlsx]

## Sheet: D
D		% IL-1RI+RII- cells								% IL-1RI+RII+ cells
		0	12h	24h	36h	48h	day3	day4	day5	0	12h	24h	36h	48h	day3	day4	day5
	HC000	6.43	8.94	14.1	13.4	17.8	12.7	7.83	4.77	0.06	1.14	4.79	9.72	10.7	5.34	1.38	0.53
	HC2018122	6.41	22.4	36.3	43.6	40.5	25	23.3	14.3	0.35	1.1	4.78	21.1	24.9	29	15.3	4.5
	HC2018128	4.57	16.5	26.6	21.8	18.8	15.3	17.5	10.3	0.06	1.51	11.4	32.4	29.7	24.4	7.09	2.15
	HC2018129	11.5	20.2	22.7	15.6	15.6	15.1	14	10.8	0.07	3.05	7.23	25.5	20.6	20.2	5.61	2
	HC2018130	6.91	23.2	27.3	21.6	20.2	15.8	13.6	11.9	0.15	2.55	4.74	20.3	19.3	26.6	11.6	7.06
