# Supplementary material for: Induction of the IL-1RII decoy receptor by NFAT/FOXP3 blocks IL-1β-dependent response of Th17 cells
Source: eLife. 2021 Jan 28;10:e61841. doi: 10.7554/eLife.61841 (PMC7872515; doi:10.7554/eLife.61841)
Supplement: Figure 2—source data 4. [file elife-61841-fig2-data4.xlsx]

## Sheet: E
E		% IL-1RI+RII- cells						% IL-1RI+RII+ cells
	anti-CD3 (μg/ml)	0	0.1	1	10		anti-CD3 (μg/ml)	0	0.1	1	10
	HC2018133	4.41	15.1	18.7	15.3		HC2018133	1.22	4.86	15.6	11.1
	HC2018135	1.13	15.3	13.5	14.8		HC2018135	0.015	7.29	6.47	10.6
	HC2018130	3.02	29.8	28	28.2		HC2018130	1.48	6.63	12.9	19.7
	HC2018131	3.01	36.2	30.4	29.9		HC2018131	0.44	7.43	6.85	11.3
	HC2018134	6.19	30.4	21.6	19.7		HC2018134	2.08	8.7	12.1	15.3
