# Supplementary material for: Induction of the IL-1RII decoy receptor by NFAT/FOXP3 blocks IL-1β-dependent response of Th17 cells
Source: eLife. 2021 Jan 28;10:e61841. doi: 10.7554/eLife.61841 (PMC7872515; doi:10.7554/eLife.61841)
Supplement: Figure 2—source data 5. [file elife-61841-fig2-data5.xlsx]

## Sheet: F
F		IL-17A (pg/ml)						IFN-γ (pg/ml)
		PBS+IgG	IL-1β+IgG	PBS+anti-IL-1RII	IL-1β+anti-IL-1RII			PBS+IgG	IL-1β+IgG	PBS+anti-IL-1RII	IL-1β+anti-IL-1RII
	HC2018144	72.1533	451.704	133.484	591.136		HC2018146	1876.61	4106.63	1336.55	4267.43
	HC2018145	93.8749	250.958	118.549	375.479		HC2018144	1758.28	6964.7	2519.83	7010.21
	HC2018146	61.0675	309.907	77.3081	431.802		HC2018145	2271.04	4725.57	2049.55	5320.25
	HC2018142	55.5788	106.535	72.8647	153.357		HC2018142	2228.56	3733.44	2889.98	4352.39
	HC2019024	103.539	181.734	103.075	301.128
