# Supplementary material for: Induction of the IL-1RII decoy receptor by NFAT/FOXP3 blocks IL-1β-dependent response of Th17 cells
Source: eLife. 2021 Jan 28;10:e61841. doi: 10.7554/eLife.61841 (PMC7872515; doi:10.7554/eLife.61841)
Supplement: Figure 3—source data 1. [file elife-61841-fig3-data1.xlsx]

## Sheet: A
A		% each subsets
		IL-1RI-RII-	IL-1RI+RII+	IL-1RI+RII-
	180511 HC2018038 Treg- Memory CD4 day2_TCR_001.fcs	61.8	13.6	20.2
	180511 HC2018039 Treg- Memory CD4 day2_TCR_003.fcs	50.1	22.2	18.6
	180517 HC000 Treg- Memory CD4 day2_TCR_001.fcs	83.3	4.86	9.57
	180517 HC2018042 Treg- Memory CD4 day2_TCR_003.fcs	55.2	12.3	27
	HC2018045	59.5	10.2	28
	HC2018044	52.1	16	28.5
	HC2018047	49.7	16.5	29.5
	HC2018048	46.3	18.6	31.1
