# Supplementary material for: Induction of the IL-1RII decoy receptor by NFAT/FOXP3 blocks IL-1β-dependent response of Th17 cells
Source: eLife. 2021 Jan 28;10:e61841. doi: 10.7554/eLife.61841 (PMC7872515; doi:10.7554/eLife.61841)
Supplement: Figure 3—source data 2. [file elife-61841-fig3-data2.xlsx]

## Sheet: B
B		% Foxp3+ cells					% CD39+ cells					% CD73+ cells					% CTLA-4+ cells
		IL-1RI-RII-	IL-1RI+RII+	IL-1RI+RII-			IL-1RI-RII-	IL-1RI+RII+	IL-1RI+RII-			IL-1RI-RII-	IL-1RI+RII+	IL-1RI+RII-			IL-1RI-RII-	IL-1RI+RII+	IL-1RI+RII-
	180511 HC2018038 Treg- Memory CD4 day2_TCR_001.fcs	28	74	53.3		170922_HC4047_2017_001.fcs	8.28	24.5	17.1		170922_HC4047_2017_001.fcs	18.6	29	26.1		170922_HC4047_2017_001.fcs	6.63	51.9	31.4
	180511 HC2018039 Treg- Memory CD4 day2_TCR_003.fcs	22.6	60.4	46.1		170922_HC4048_2017_002.fcs	6.7	6.18	2.41		170922_HC4048_2017_002.fcs	12.5	20.1	19.4		170922_HC4048_2017_002.fcs	0.64	45.2	28
	180517 HC000 Treg- Memory CD4 day2_TCR_001.fcs	19.2	69.1	59.5		170922_HC4049_2017_003.fcs	7.64	45.5	41.5		170922_HC4049_2017_003.fcs	29.1	35.1	29.4		170922_HC4049_2017_003.fcs	16.8	56.5	36.2
	180517 HC2018042 Treg- Memory CD4 day2_TCR_003.fcs	21.2	44.2	32.6		170922_HC4051_2017_004.fcs	7.49	46.3	34.4		170922_HC4051_2017_004.fcs	16.3	27.4	22.8		170922_HC4051_2017_004.fcs	16.2	43.2	26.9
	HC2018045	25.5	61.5	48.6		171016 HC4083_1 TCR_002.fcs	7.7	4.65	4.72		171016 HC4083_1 TCR_002.fcs	25.7	53.5	41.9		171016 HC4083_1 TCR_002.fcs	0.47	82.2	52.8
	HC2018044	5.79	29.4	13.5		171016 HC2017122_1 TCR_001.fcs	5.3	25.5	22.3		171016 HC2017122_1 TCR_001.fcs	35	57.9	46		171016 HC2017122_1 TCR_001.fcs	7.45	58.8	41
	HC2018047	31.7	63.3	51.6		171020 HC4093_1 TCR_002.fcs	19.8	11.3	4.11		171020 HC4093_1 TCR_002.fcs	23	36	27.8		171020 HC4093_1 TCR_002.fcs	0.85	88.5	58.5
	HC2018048	26.6	59.8	43.2		171020 HC4095_1 TCR_003.fcs	11.6	6.14	3.48		171020 HC4095_1 TCR_003.fcs	25.7	28.1	17.8		171020 HC4095_1 TCR_003.fcs	0.38	80.7	55.8
						171020 HC2017123_1 TCR_001.fcs	24.7	1.73	0.68		171020 HC2017123_1 TCR_001.fcs	32.3	41.7	34.4		171020 HC2017123_1 TCR_001.fcs	0.57	84.8	62.1
