# Supplementary material for: Induction of the IL-1RII decoy receptor by NFAT/FOXP3 blocks IL-1β-dependent response of Th17 cells
Source: eLife. 2021 Jan 28;10:e61841. doi: 10.7554/eLife.61841 (PMC7872515; doi:10.7554/eLife.61841)
Supplement: Figure 3—source data 3. [file elife-61841-fig3-data3.xlsx]

## Sheet: C
C		% each subsets						% each subsets						% each subsets
	IL-1RI+RII-	ex-Th17	Th17	Th1	etc		IL-1RI+RII+	ex-Th17	Th17	Th1	etc		IL-1RI-RII-	ex-Th17	Th17	Th1	etc
	170922_HC4047_2017_001.fcs	31.3	22.3	20.8	25.6		170922_HC4047_2017_001.fcs	47	9.78	23.1	20.12		170922_HC4047_2017_001.fcs	14.9	10.6	30.7	43.8
	170922_HC4048_2017_002.fcs	43.5	19.6	17.2	19.7		170922_HC4048_2017_002.fcs	52	11	19	18		170922_HC4048_2017_002.fcs	25.1	13.8	27.2	33.9
	170922_HC4049_2017_003.fcs	52.7	20	13.3	14		170922_HC4049_2017_003.fcs	62.2	9.18	14.8	13.82		170922_HC4049_2017_003.fcs	35.6	9.66	25.1	29.64
	170922_HC4051_2017_004.fcs	40.3	12.2	24.8	22.7		170922_HC4051_2017_004.fcs	55.7	8.9	17	18.4		170922_HC4051_2017_004.fcs	19.1	6.81	39	35.09
	171016 HC4083_1 TCR_002.fcs	25.4	20.6	28.3	25.7		171016 HC4083_1 TCR_002.fcs	40.3	11.2	24	24.5		171016 HC4083_1 TCR_002.fcs	8.99	5.37	33.8	51.84
	171016 HC2017122_1 TCR_001.fcs	23.1	14.5	41.7	20.7		171016 HC2017122_1 TCR_001.fcs	32.8	5.97	41.8	19.43		171016 HC2017122_1 TCR_001.fcs	8.6	5.55	44.1	41.75
	171020 HC4093_1 TCR_002.fcs	13.3	11.5	41.2	34		171020 HC4093_1 TCR_002.fcs	25.7	13.4	31.2	29.7		171020 HC4093_1 TCR_002.fcs	8.16	6.7	40.6	44.54
	171020 HC4095_1 TCR_003.fcs	9.07	27.2	12.2	51.53		171020 HC4095_1 TCR_003.fcs	20.1	23.4	19	37.5		171020 HC4095_1 TCR_003.fcs	6.18	11	22.6	60.22
	171020 HC2017123_1 TCR_001.fcs	19.7	15.7	34.2	30.4		171020 HC2017123_1 TCR_001.fcs	29.1	15.4	28.9	26.6		171020 HC2017123_1 TCR_001.fcs	15.7	8.88	33.2	42.22
