# Supplementary material for: Induction of the IL-1RII decoy receptor by NFAT/FOXP3 blocks IL-1β-dependent response of Th17 cells
Source: eLife. 2021 Jan 28;10:e61841. doi: 10.7554/eLife.61841 (PMC7872515; doi:10.7554/eLife.61841)
Supplement: Figure 3—source data 4. [file elife-61841-fig3-data4.xlsx]

## Sheet: D
D		% IL-17+IFN-γ- cells					% IL-17+IFN-γ+ cells					% IL-17+IFN-γ+ cells
		IL-1RI-RII-	IL-1RI+RII+	IL-1RI+RII-			IL-1RI-RII-	IL-1RI+RII+	IL-1RI+RII-			IL-1RI-RII-	IL-1RI+RII+	IL-1RI+RII-
	171103_HC4129_003.fcs	4.38	5.17	17.3		171103_HC4129_003.fcs	0.96	0.86	1.41		171103_HC4129_003.fcs	32.5	17.2	8.5
	171103_HC4139_001.fcs	4.31	5.48	16.5		171103_HC4139_001.fcs	1.32	2.9	2.31		171103_HC4139_001.fcs	25.1	17.1	7.01
	171103_HC2017129_004.fcs	2.75	3.96	10.4		171103_HC2017129_004.fcs	1.41	1.24	2.09		171103_HC2017129_004.fcs	31.7	8.79	11
	HC2017101	2.33	3.95	9.33		HC2017101	0.77	1.37	3.3		HC2017101	29.9	17.5	17
	HC2017102	2.64	9.49	15		HC2017102	0.82	1.93	1.85		HC2017102	29.7	16	6.72
