# Supplementary material for: Induction of the IL-1RII decoy receptor by NFAT/FOXP3 blocks IL-1β-dependent response of Th17 cells
Source: eLife. 2021 Jan 28;10:e61841. doi: 10.7554/eLife.61841 (PMC7872515; doi:10.7554/eLife.61841)
Supplement: Figure 4—source data 1. [file elife-61841-fig4-data1.xlsx]

## Sheet: B
B		% IL-1RI+RII- cells					% IL-1RI+RII- cells
	CsA (nM)	0	10	50		CsA (nM)	0	10	50
	HC2015077	10.6	10.9	11.6		HC2015077	7.33	5.17	2.31
	HC2015078	15.5	17.4	10.5		HC2015078	6.76	4.02	0.7
	HC2016125	11.4	15.9	15.4		HC2016125	19.9	10	4.11
	HC2016126	16.7	22	20.2		HC2016126	20	5.58	1.79
	HC2015093	15.6	15.4	16		HC2015093	10.9	15.7	8.25
