# Supplementary material for: Induction of the IL-1RII decoy receptor by NFAT/FOXP3 blocks IL-1β-dependent response of Th17 cells
Source: eLife. 2021 Jan 28;10:e61841. doi: 10.7554/eLife.61841 (PMC7872515; doi:10.7554/eLife.61841)
Supplement: Figure 4—source data 2. [file elife-61841-fig4-data2.xlsx]

## Sheet: C
C		Fold increase (IL-1RII)
		PBS+VEET	PBS+VIVIT	TCR+VEET	TCR+VIVIT
	HC2017102	1	1.07993	4.02057	0.960509
	HC2017104	1	1.82814	6.7938	0.185344
	HC2017107	1	3.29363	5.36131	1.23669
