# Supplementary material for: Induction of the IL-1RII decoy receptor by NFAT/FOXP3 blocks IL-1β-dependent response of Th17 cells
Source: eLife. 2021 Jan 28;10:e61841. doi: 10.7554/eLife.61841 (PMC7872515; doi:10.7554/eLife.61841)
Supplement: Figure 4—source data 3. [file elife-61841-fig4-data3.xlsx]

## Sheet: G
		% IL-1RI+ cells					% IL-1RII+ cells
G		PBS	VD3+IL-2	VD3+IL-2+CsA			PBS	VD3+IL-2	VD3+IL-2+CsA
	HC2017038	23.29	13.26			HC2017038	15.84	21.41
	HC2017026	29.3	22.27			HC2017026	24.06	34.4
	HC2017027	23.7	15.99			HC2017027	25	25.27
	HC2017041	16.23	12.12	13.09		HC2017041	13.68	26.83	8.45
	HC3717	20.92	25.8	10.87		HC3717	11.22	31.4	3.22
	HC2017043	25.39	19.71	21.07		HC2017043	36.7	44.6	25.1
