# Supplementary material for: Induction of the IL-1RII decoy receptor by NFAT/FOXP3 blocks IL-1β-dependent response of Th17 cells
Source: eLife. 2021 Jan 28;10:e61841. doi: 10.7554/eLife.61841 (PMC7872515; doi:10.7554/eLife.61841)
Supplement: Figure 4—source data 4. [file elife-61841-fig4-data4.xlsx]

## Sheet: H
H		Ratio
		PBS	VD3+IL-2	VD3+IL-2+CsA
	HC2017038	0.68012	1.61463
	HC2017026	0.82116	1.54468
	HC2017027	1.05485	1.58036
	HC2017041	0.842884	2.2137	0.645531
	HC3717	0.536329	1.21705	0.296228
	HC2017043	1.44545	2.26281	1.19127
