# Supplementary material for: Induction of the IL-1RII decoy receptor by NFAT/FOXP3 blocks IL-1β-dependent response of Th17 cells
Source: eLife. 2021 Jan 28;10:e61841. doi: 10.7554/eLife.61841 (PMC7872515; doi:10.7554/eLife.61841)
Supplement: Figure 5—source data 1. [file elife-61841-fig5-data1.xlsx]

## Sheet: A
		% CD25+ cells
A		PBS	Foxp3 399A	Foxp3 393-403
	HC2017087	76.7	73.4	31.7
	HC2017093	84.5	83.7	33.1
	HC2017099	72.5	75.6	29.7
	HC2017102	92.2	90.8	33.4
