# Supplementary material for: Induction of the IL-1RII decoy receptor by NFAT/FOXP3 blocks IL-1β-dependent response of Th17 cells
Source: eLife. 2021 Jan 28;10:e61841. doi: 10.7554/eLife.61841 (PMC7872515; doi:10.7554/eLife.61841)
Supplement: Figure 5—source data 2. [file elife-61841-fig5-data2.xlsx]

## Sheet: C
		% IL-1RI+IL-1RII+ cells					% IL-1RI+IL-1RII- cells
C		PBS	Foxp3 399A	Foxp3 393-403			PBS	Foxp3 399A	Foxp3 393-403
	HC2017087	6.11	7.29	2.86		HC2017087	15.9	16.8	8.87
	HC2017093	6	5.68	3.24		HC2017093	11.7	10.6	10.2
	HC2017099	9.57	10.1	5.92		HC2017099	11.1	12.8	11.3
	HC2017102	9.2	9.11	3.55		HC2017102	12.1	11.2	8.2
