# Supplementary material for: Induction of the IL-1RII decoy receptor by NFAT/FOXP3 blocks IL-1β-dependent response of Th17 cells
Source: eLife. 2021 Jan 28;10:e61841. doi: 10.7554/eLife.61841 (PMC7872515; doi:10.7554/eLife.61841)
Supplement: Figure 5—source data 3. [file elife-61841-fig5-data3.xlsx]

## Sheet: D
D		pGL4.10 basic	pGL4/IL-1RII-a215	pGL4/IL-1RII-a814	pGL4/IL-1RII-a1414			pGL4.10 basic	pGL4/IL-1RII-a1414	pGL4/IL-1RII-a1414mu
	#1	1	2.60787	3.04409	8.99257		#1	1	8.18637	4.88744
	#2	1	4.91735	2.80107	10.261		#2	1	9.57072	2.30824
	#3	1	2.71542	2.02394	10.9342		#3	1	5.06615	0.528047
	#4	1	7.54746	7.79786	12.6853
