# Supplementary material for: Induction of the IL-1RII decoy receptor by NFAT/FOXP3 blocks IL-1β-dependent response of Th17 cells
Source: eLife. 2021 Jan 28;10:e61841. doi: 10.7554/eLife.61841 (PMC7872515; doi:10.7554/eLife.61841)
Supplement: Figure 5—source data 4. [file elife-61841-fig5-data4.xlsx]

## Sheet: E
		NFAT B1				NFAT B2				NFAT B3				NFAT BC
E		Control	TCR			Control	TCR			Control	TCR			Control	TCR
	HC2019006+HC2019005+HC2019001	1	2.42804		HC2019006+HC2019005+HC2019001	1	1.94923		HC2019006+HC2019005+HC2019001	1	1.2358		HC2019006+HC2019005+HC2019001	1	5.02962
	HC2019007+HC2019008	1	3.57625		HC2019007+HC2019008	1	2.32855		HC2019007+HC2019008	1	2.642		HC2019007+HC2019008	1	6.82317
	HC2019025+HC2019024	1	4.60863		HC2019025+HC2019024	1	1.12169		HC2019025+HC2019024	1	3.02653		HC2019025+HC2019024	1	3.65199
	HC2019030+HC2019031	1	4.82467		HC2019030+HC2019031	1	0.494591		HC2019030+HC2019031	1	1.26516		HC2019030+HC2019031	1	2.39636
	HC2019039+HC2019042	1	4.16334		HC2019039+HC2019042	1	2.81847		HC2019039+HC2019042	1	2.94031		HC2019039+HC2019042	1	1.47139
		Foxp3 B1				Foxp3 B2				Foxp3 B3				Foxp3 BC
		Control	TCR			Control	TCR			Control	TCR			Control	TCR
	HC2019006+HC2019005+HC2019001	1	1.45638		HC2019006+HC2019005+HC2019001	1	1.1247		HC2019006+HC2019005+HC2019001	1	1.6215		HC2019006+HC2019005+HC2019001	1	1.65182
	HC2019007+HC2019008	1	1.01907		HC2019007+HC2019008	1	1.268		HC2019007+HC2019008	1	2.60683		HC2019007+HC2019008	1	1.95943
	HC2019025+HC2019024	1	1.05421		HC2019025+HC2019024	1	0.975138		HC2019025+HC2019024	1	1.59218		HC2019025+HC2019024	1	1.43059
	HC2019027+HC2019028	1	1.34018		HC2019027+HC2019028	1	1.5307		HC2019027+HC2019028	1	2.25958		HC2019027+HC2019028	1	2.05206
	HC2019030+HC2019031	1	1.03737		HC2019030+HC2019031	1	2.29548		HC2019030+HC2019031	1	3.6806		HC2019030+HC2019031	1	2.87303
	HC2019039+HC2019042	1	1.14349		HC2019039+HC2019042	1	1.35962		HC2019039+HC2019042	1	1.8051		HC2019039+HC2019042	1	1.49183
