# Supplementary material for: Induction of the IL-1RII decoy receptor by NFAT/FOXP3 blocks IL-1β-dependent response of Th17 cells
Source: eLife. 2021 Jan 28;10:e61841. doi: 10.7554/eLife.61841 (PMC7872515; doi:10.7554/eLife.61841)
Supplement: Figure 6—source data 1. [file elife-61841-fig6-data1.xlsx]

## Sheet: A
A		% IL-17+IFN-γ- cells					% IL-17+IFN-γ+ cells					% IL-17-IFN-γ+ cells
		IL-1RI-RII-	IL-1RI+RII+	IL-1RI+RII-			IL-1RI-RII-	IL-1RI+RII+	IL-1RI+RII-			IL-1RI-RII-	IL-1RI+RII+	IL-1RI+RII-
	HC2017074	1.93	7.73	8.96		HC2017074	1.51	2.97	3.59		HC2017074	36.3	24.8	34.6
	HC2017075	2.04	6.91	11.5		HC2017075	0.76	2.34	5.51		HC2017075	26.9	15.4	21.8
	HC2017086	3.99	22.2	24		HC2017086	2.62	6.79	10.1		HC2017086	27.7	17.1	15.9
	HC2017090	2.75	21.1	22.8		HC2017090	1.88	6.52	7.69		HC2017090	26	14.9	14
	HC2017098	0.97	12.7	14.1		HC2017098	0.72	4.59	5.05		HC2017098	51.7	32.3	26.7
