# Supplementary material for: Induction of the IL-1RII decoy receptor by NFAT/FOXP3 blocks IL-1β-dependent response of Th17 cells
Source: eLife. 2021 Jan 28;10:e61841. doi: 10.7554/eLife.61841 (PMC7872515; doi:10.7554/eLife.61841)
Supplement: Figure 6—source data 2. [file elife-61841-fig6-data2.xlsx]

## Sheet: B
B		IL-17A (pg/ml)					IFN-γ (pg/ml)
		RI-RII- +IL-1b	RI+RII+ +IL-1b	RI+RII- +IL-1b			RI-RII- +IL-1b	RI+RII+ +IL-1b	RI+RII- +IL-1b
	HC2017074	62.64	1512.37	2479.24		HC2017074'	7391.76	11244.7	12503.5
	HC2017075	98.11	4488.68	4764.29		HC2017075	8974.12	6432.94	8962.35
	HC2017086	2510.66	5174.82	5445.47		HC2017086	17766.3	14051.7	17767.9
	HC2017090	274.809	3519.27	4533.98		HC2017090	8739.84	6457.56	11472
	HC2017098	36.76	2456.35	3220.13		HC2017098	3328.97	4343.18	8412.87
