# Supplementary material for: Induction of the IL-1RII decoy receptor by NFAT/FOXP3 blocks IL-1β-dependent response of Th17 cells
Source: eLife. 2021 Jan 28;10:e61841. doi: 10.7554/eLife.61841 (PMC7872515; doi:10.7554/eLife.61841)
Supplement: Figure 6—source data 3. [file elife-61841-fig6-data3.xlsx]

## Sheet: C
C		% Foxp3+ cells				% IFN-γ+ cells
		IL-1RI+RII+	IL-1RI+RII-			IL-1RI+RII+	IL-1RI+RII-
	HC2017074	26.9	40.9		HC2017074	11.4	6.24
	HC2017075	24	25.5		HC2017075	11.2	7.8
	HC2017078	15.8	17.9		HC2017078	26.1	14
	HC2017086	27.3	24.6		HC2017086	14	9.78
	HC2017090	24.4	35.9		HC2017090	10.6	6.36
	HC2017098	17.8	20.3		HC2017098	13.5	11
