# Supplementary material for: Induction of the IL-1RII decoy receptor by NFAT/FOXP3 blocks IL-1β-dependent response of Th17 cells
Source: eLife. 2021 Jan 28;10:e61841. doi: 10.7554/eLife.61841 (PMC7872515; doi:10.7554/eLife.61841)
Supplement: Figure 6—source data 4. [file elife-61841-fig6-data4.xlsx]

## Sheet: D
D		% CD39+ cells					% CD73+ cells					% CTLA-4+ cells					% CCR6+ cells					% CD161+ cells
		IL-1RI-RII-	IL-1RI+RII+	IL-1RI+RII-			IL-1RI-RII-	IL-1RI+RII+	IL-1RI+RII-			IL-1RI-RII-	IL-1RI+RII+	IL-1RI+RII-			IL-1RI-RII-	IL-1RI+RII+	IL-1RI+RII-			IL-1RI-RII-	IL-1RI+RII+	IL-1RI+RII-
	HC2017120	0.95	6.22	5.9		HC2017120	18.9	15.7	15.8		HC2017120	18.6	68.9	44.3		HC2017120	20.6	44	51.7		HC2017120	10.4	17.5	18.6
	HC4083	0.32	1.77	3.54		HC4083	13.5	36.1	19.8		HC4083	5.31	60.4	38.9		HC4083	12	43.9	42.9		HC4083	10.8	13.1	23.3
	HC2017122	7.09	20.5	17.5		HC2017122	14.4	27.1	15.3		HC2017122	3.26	53.5	24.6		HC2017122	12.1	34	35.7		HC2017122	9.89	9	16
	HC4093	0.63	6.4	3.17		HC4093	7.45	10.1	6.85		HC4093	15.6	76.9	44.5		HC4093	13.6	24.9	35.1		HC4093	14.1	15.3	17.4
	HC4095	0.19	2.86	2.11		HC4095	19.3	14	12.2		HC4095	8.09	57.6	36		HC4095	15.7	34.4	39		HC4095	18.2	20.8	29.9
	HC2017123.	0.41	1.33	0.85		HC2017123.	17.8	20.6	16.3		HC2017123.	21.7	77.1	54.2		HC2017123.	24	35.9	44.2		HC2017123.	17.2	17.2	19.5
