# Supplementary material for: Induction of the IL-1RII decoy receptor by NFAT/FOXP3 blocks IL-1β-dependent response of Th17 cells
Source: eLife. 2021 Jan 28;10:e61841. doi: 10.7554/eLife.61841 (PMC7872515; doi:10.7554/eLife.61841)
Supplement: Figure 7—source data 1. [file elife-61841-fig7-data1.xlsx]

## Sheet: A
A		% IL-1RI+ cells							% IL-1RI+ cells
		RA SFMC		RA PBMC		HC PBMC			RA SFMC		RA PBMC		HC PBMC
	RA2015001	25.34	180312_RA2018001_001.fcs	20.3	HC3249_PBMC_002.fcs	8.66		RA2015001	0.81	180312_RA2018001_001.fcs	0.034	HC3249_PBMC_002.fcs	0.49
	RA2015004	8.81	180312_RA2018002_002.fcs	17.4	HC3258_PBMC_014.fcs	6.25		RA2015004	0.28	180312_RA2018002_002.fcs	0.029	HC3258_PBMC_014.fcs	0.22
	RA2015005	10.93	180315_RA2018003_002.fcs	5.68	HC3264_PBMC_004.fcs	11.78		RA2015005	0.38	180315_RA2018003_002.fcs	0.072	HC3264_PBMC_004.fcs	0.89
	RA2015006	22.53	180316_RA2018004_001.fcs	5.3	HC3277_PBMC_012.fcs	5.401		RA2015006	0.43	180316_RA2018004_001.fcs	0.052	HC3277_PBMC_012.fcs	0.301
	RA2015010	20.08	180316_RA2018005_002.fcs	11.5	HC3254_PBMC_020.fcs	6.67		RA2015010	1.57	180316_RA2018005_002.fcs	0.02	HC3254_PBMC_020.fcs	0.79
	RA2015011	25.67	180320_RA2018006_001.fcs	9.96	HC3278_PBMC_016.fcs	6.301		RA2015011	2.31	180320_RA2018006_001.fcs	0.11	HC3278_PBMC_016.fcs	0.271
	RA2015012	19.93	180320_RA2018007_002.fcs	5.34	HC3298_PBMC_018.fcs	3.81		RA2015012	0.94	180320_RA2018007_002.fcs	0.064	HC3298_PBMC_018.fcs	0.72
	RA2016001	17.88	180320_RA2018008_003.fcs	15.5	HC3299_PBMC_022.fcs	8.03		RA2016001	0.43	180320_RA2018008_003.fcs	0.29	HC3299_PBMC_022.fcs	1.04
	RA2016002	8.46	180320_RA2018009_004.fcs	10.4				RA2016002	1.08	180320_RA2018009_004.fcs	0.029
	RA2016003	7.57	180322_RA2018010 PBMC_001.fcs	17.3				RA2016003	0.24	180322_RA2018010 PBMC_001.fcs	0.11
	RA2016005	24.96	180322_RA2018011 PBMC_002.fcs	7.26				RA2016005	3.85	180322_RA2018011 PBMC_002.fcs	0.00905
	RA2016006	8.26	180322_RA2018011 SFMC_003.fcs	14.2				RA2016006	0.22	180322_RA2018011 SFMC_003.fcs	0.18
	RA2016007	15.35	180416_RA2018013 PBMC_thawed_001.fcs	20.8				RA2016007	1.08	180416_RA2018013 PBMC_thawed_001.fcs	0.61
	RA2016008	15.04	180416_RA2018014 PBMC_thawed_002.fcs	11.8				RA2016008	0.07	180416_RA2018014 PBMC_thawed_002.fcs	0.27
	RA2018011	14.38	180416_RA2018015 PBMC_thawed_003.fcs	13.9				RA2018011	0.49	180416_RA2018015 PBMC_thawed_003.fcs	0
			180416_RA2018016 PBMC_thawed_004.fcs	14.3						180416_RA2018016 PBMC_thawed_004.fcs	0.078
			180416_RA2018017 PBMC_thawed_005.fcs	24.2						180416_RA2018017 PBMC_thawed_005.fcs	0.48
			180416_RA2018018 PBMC_thawed_006.fcs	15.4						180416_RA2018018 PBMC_thawed_006.fcs	0.75
			180418_RA2018019 PBMC_thawed_001.fcs	24.3						180418_RA2018019 PBMC_thawed_001.fcs	0.21
			180418_RA2018020 PBMC_thawed_003.fcs	22.4						180418_RA2018020 PBMC_thawed_003.fcs	0.32
			180418_RA2018021 PBMC_thawed_004.fcs	17						180418_RA2018021 PBMC_thawed_004.fcs	0.086
			180411_RA2018022 PBMC_001.fcs	18						180411_RA2018022 PBMC_001.fcs	0.031
			180411_RA2018023 PBMC_002.fcs	11						180411_RA2018023 PBMC_002.fcs	0.026
