# Supplementary material for: Induction of the IL-1RII decoy receptor by NFAT/FOXP3 blocks IL-1β-dependent response of Th17 cells
Source: eLife. 2021 Jan 28;10:e61841. doi: 10.7554/eLife.61841 (PMC7872515; doi:10.7554/eLife.61841)
Supplement: Figure 7—source data 2. [file elife-61841-fig7-data2.xlsx]

## Sheet: D
D		% IL-1RI+IL-1RII- cells							% IL-1RI+IL-1RII+ cells
		RA SFMC		RA PBMC		HC PBMC			RA SFMC		RA PBMC		HC PBMC
	RA2016005	13.4	180315 RA2018001_TCR_001.fcs	15.6	HC3794	9.05		RA2016005	9.35	180315 RA2018001_TCR_001.fcs	16.4	HC3794	19.6
	RA2016006	11.1	180315 RA2018002_TCR_003.fcs	10.4	HC4277	16.7		RA2016006	12.7	180315 RA2018002_TCR_003.fcs	22.8	HC4277	26.7
	RA2016003	11.1	180319 RA2018004_TCR.fcs	7.11	HC4278	11.6		RA2016003	5.7	180319 RA2018004_TCR.fcs	12.6	HC4278	30.2
	RA2016004	10.7	180319 RA2018005_TCR.fcs	17.3	HC4279	15.7		RA2016004	5.08	180319 RA2018005_TCR.fcs	6.69	HC4279	16.1
	RA2016001	18.2	180413_RA2018024 TCR D2_002.fcs	14.7	HC3249	12.3		RA2016001	4.78	180413_RA2018024 TCR D2_002.fcs	15.9	HC3249	20.4
			180413_RA2018025 TCR D2_003.fcs	32.2	HC3264	14.6				180413_RA2018025 TCR D2_003.fcs	19.8	HC3264	30.1
			180412 RA2018023_TCR_001_006.fcs	12.6						180412 RA2018023_TCR_001_006.fcs	2.67
			180418_thawed_RA2018015 TCR PBMC CD4 M D2_001.fcs	33.1						180418_thawed_RA2018015 TCR PBMC CD4 M D2_001.fcs	14.3
			180418_thawed_RA2018016 TCR PBMC CD4 M D2_002.fcs	30.3						180418_thawed_RA2018016 TCR PBMC CD4 M D2_002.fcs	14.4
			180418_thawed_RA2018017 TCR PBMC CD4 M D2_003.fcs	33.8						180418_thawed_RA2018017 TCR PBMC CD4 M D2_003.fcs	11.5
			180418_thawed_RA2018018 TCR PBMC CD4 M D2_004.fcs	21.4						180418_thawed_RA2018018 TCR PBMC CD4 M D2_004.fcs	14.5
			180420_thawed_RA2018020 TCR PBMC CD4 M D2_003.fcs	34.9						180420_thawed_RA2018020 TCR PBMC CD4 M D2_003.fcs	14.8
			180420_thawed_RA2018022 TCR PBMC CD4 M D2_003.fcs	14.8						180420_thawed_RA2018022 TCR PBMC CD4 M D2_003.fcs	19.9
