# Supplementary material for: Induction of the IL-1RII decoy receptor by NFAT/FOXP3 blocks IL-1β-dependent response of Th17 cells
Source: eLife. 2021 Jan 28;10:e61841. doi: 10.7554/eLife.61841 (PMC7872515; doi:10.7554/eLife.61841)
Supplement: Figure 7—source data 3. [file elife-61841-fig7-data3.xlsx]

## Sheet: E
E		ratio
		RA SFMC		RA PBMC		HC PBMC
	RA2016005	0.697761	180315 RA2018001_TCR_001.fcs	1.05128	HC3794	2.16575
	RA2016006	1.14414	180315 RA2018002_TCR_003.fcs	2.19231	HC4277	1.5988
	RA2016003	0.513514	180319 RA2018004_TCR.fcs	1.77215	HC4278	2.60345
	RA2016004	0.474766	180319 RA2018005_TCR.fcs	0.386705	HC4279	1.02548
	RA2016001	0.262637	180413_RA2018024 TCR D2_002.fcs	1.08163	HC3249	1.65854
			180413_RA2018025 TCR D2_003.fcs	0.614907	HC3264	2.06164
			180412 RA2018023_TCR_001_006.fcs	0.211905
			180418_thawed_RA2018015 TCR PBMC CD4 M D2_001.fcs	0.432024
			180418_thawed_RA2018016 TCR PBMC CD4 M D2_002.fcs	0.475248
			180418_thawed_RA2018017 TCR PBMC CD4 M D2_003.fcs	0.340237
			180418_thawed_RA2018018 TCR PBMC CD4 M D2_004.fcs	0.67757
			180420_thawed_RA2018020 TCR PBMC CD4 M D2_003.fcs	0.424069
			180420_thawed_RA2018022 TCR PBMC CD4 M D2_003.fcs	1.34459
