# Supplementary material for: Induction of the IL-1RII decoy receptor by NFAT/FOXP3 blocks IL-1β-dependent response of Th17 cells
Source: eLife. 2021 Jan 28;10:e61841. doi: 10.7554/eLife.61841 (PMC7872515; doi:10.7554/eLife.61841)
Supplement: Figure 7—source data 4. [file elife-61841-fig7-data4.xlsx]

## Sheet: F
F		ratio							ratio
		HC + IgG		HC + anti-IL-1RII		RA			HC + IgG		HC + anti-IL-1RII		RA
	HC2018144	1.61825	HC2018144	2.6505	RA2018014	4.35857		HC2018144	3.93	HC2018144	3.46	RA2018014	0.98
	HC2018145	2.03333	HC2018145	2.8009	RA2018016	3.4019		HC2018145	1.64	HC2018145	1.29	RA2018016	1.48
	HC2018146	2.76421	HC2018146	4.46035	RA2018017	3.04289		HC2018146	1.71	HC2018146	2.32	RA2018017	1.32
	HC2018142	3.0952	HC2018142	3.39905	RA2018022	2.5794		HC2018142	3.85	HC2018142	3.88	RA2018022	1.73
